# Supplementary material for: The Absence of Evidence is Evidence of Non-Sense: Cross-Sectional Study on the Quality of Psoriasis-Related Videos on YouTube and Their Reception by Health Seekers
Source: PubMed Central journal article supplement (PMC6357908; doi:10.2196/11935), 2019-01-16
Supplement: jmir_v21i1e11935_app3.pdf [file jmir_v21i1e11935_app3.pdf]

# Appendix 2

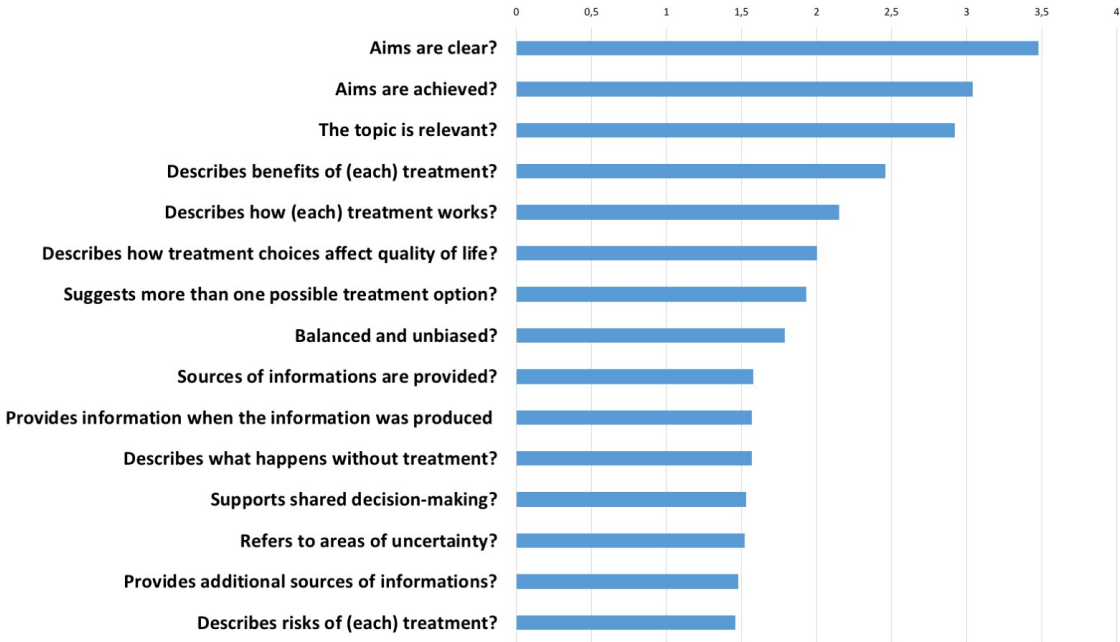

# Appendix 2

*Rating of the 15 items of the DISCERN tool on a scale from 0 to 5 (with 5 being the maximum).*
